# Supplementary material for: Wildfire influences on the variability and trend of summer surface ozone in the mountainous western United States
Source: Copernicus journal article supplement (doi:10.5194/acp-2016-646), 2016-07-26
Supplement: Supplementary file 1 [file acp-2016-646-supplement.pdf]

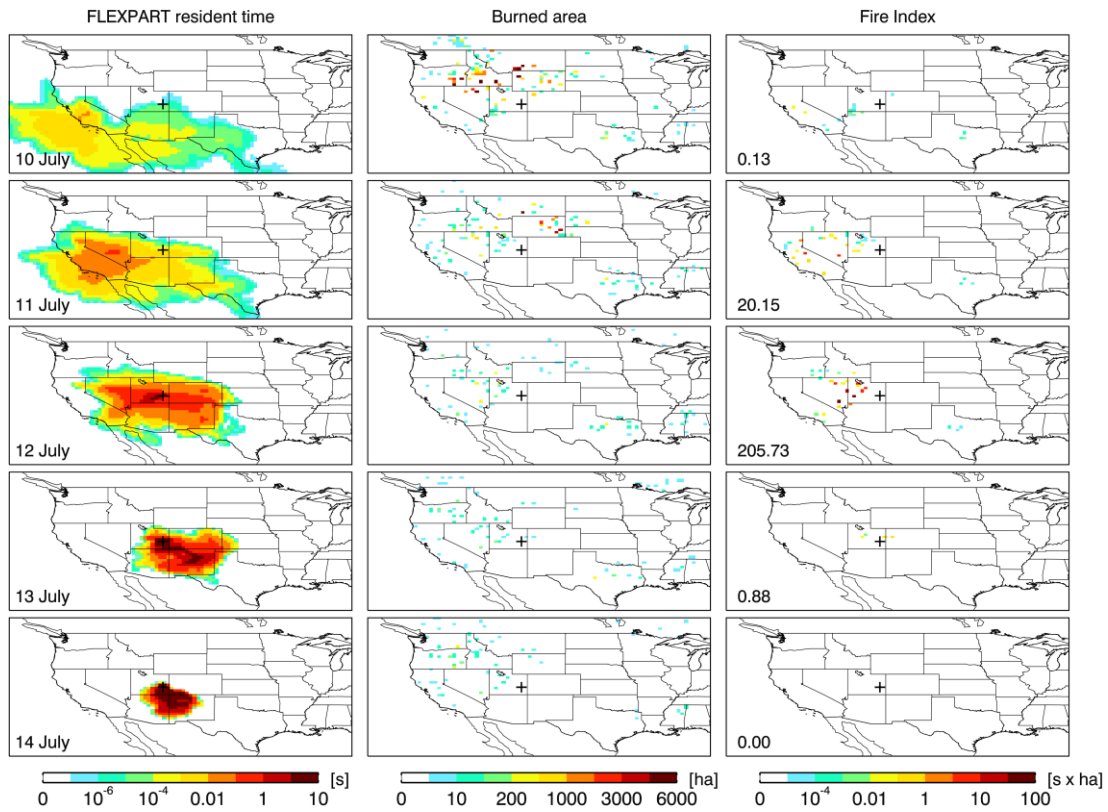

1

2 **Figure S1.** Example of the Fire Index calculation for July 14, 2006 at CASTNet site

3 CAN (marked as black cross). Left panels show the daily mean resident time

4 calculated by FLEXPART for each backward day, middle panels show the daily

5 wildfire areas burned for that day, and right panels show the mapped Fire Index

6 (product of the left and middle panel), with the sum FI for that day shown inset. Fire

7 Index (1) is then defined as the resident time of July 10 multiplying wildfire areas

8 burned on the same day, resulting in the value of 0.13. Total Fire Index is the sum of

9 Fire Index (1) to (5): 226.89.

10

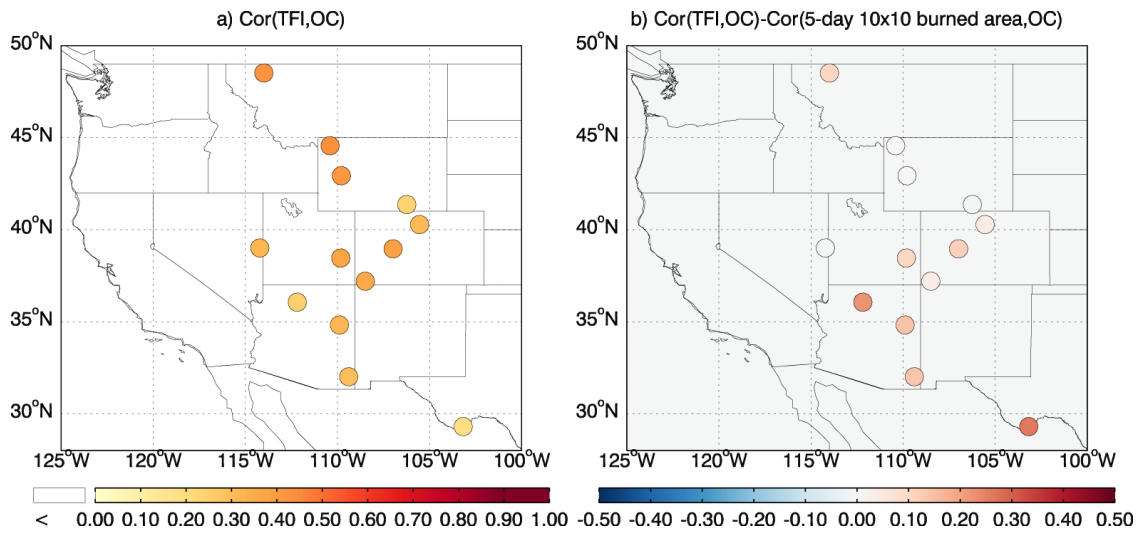

11

12 **Figure S2.** Correlation coefficients between the Total Fire Index (TFI) and measured  
 13 OC aerosol concentrations at 13 collocated CASTNet and IMPROVE sites in the  
 14 Intermountain West for the summers 1989-2010. The right panel shows the correlation  
 15 differences with respect to those using 5-day wildfire areas burned within 10°x10°  
 16 regions rather than TFI.

17

18

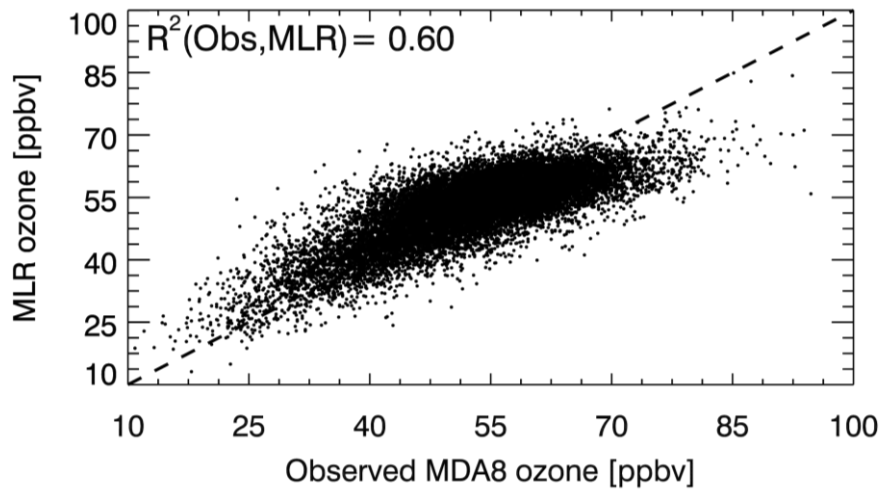

20

21 **Figure S3.** Comparison of the measured versus MLR predicted MDA8 ozone  
22 concentrations in the summers 1989-2010 for the ensemble of 13 Intermountain West  
23 CASTNet sites. The 1:1 line (dashed line) and the coefficient of determination ( $R^2$ ) are  
24 shown in the inset.

25

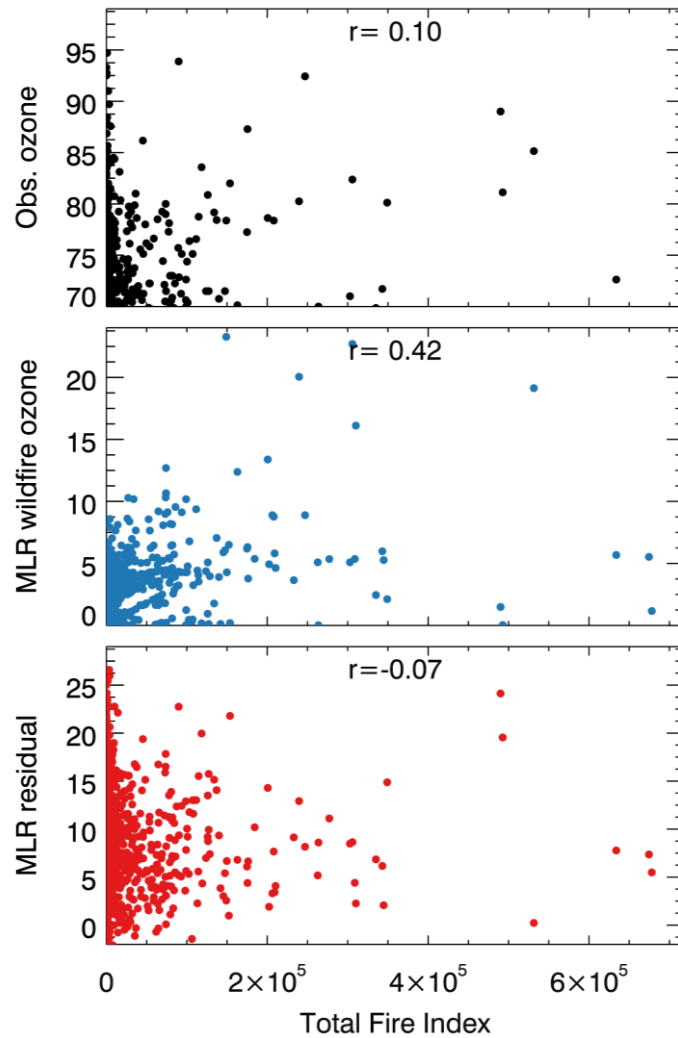

26

27 **Figure S4.** Evaluation of the MLR model low biases (MLR residuals) when measured  
 28 MDA8 ozone exceeds 70 ppbv as indicated in Figure S3. Scatter-plots of Total Fire  
 29 Index (TFI) versus measured MDA8 ozone (top panel), MLR wildfire ozone  
 30 enhancements (middle panel), and MLR residuals (bottom panel) are shown. The  
 31 correlation coefficients are also shown inset. The poor correlation between TFI and  
 32 MLR residuals indicates that the low biases may not result from model underestimates  
 33 of wildfire influences.

34

35 **Table S1.** Variables used in the MLR models.

| Variable                                 | Predictors used in MLR model <sup>a</sup>                      | Data source                                                                                                                                                                                                     |
|------------------------------------------|----------------------------------------------------------------|-----------------------------------------------------------------------------------------------------------------------------------------------------------------------------------------------------------------|
| FI <sub>s</sub> , FI <sub>l</sub>        | Fire Index for short/long period                               | FLEXPART 5-day backward trajectories and 0.5°×0.5° wildfire areas burned                                                                                                                                        |
| SqrFI <sub>s</sub><br>SqrFI <sub>l</sub> | Square root of Fire Index                                      |                                                                                                                                                                                                                 |
| Tsurf                                    | Daytime mean <sup>b</sup> surface temperature                  | CASTNet surface monitoring sites in the US Intermountain West ( <a href="http://www.epa.gov/castnet">http://www.epa.gov/castnet</a> ), for 13 CASTNet sites only                                                |
| WSPsurf                                  | Daytime mean wind speed                                        |                                                                                                                                                                                                                 |
| RH                                       | Daytime mean relative humidity                                 |                                                                                                                                                                                                                 |
| SRAD                                     | Daytime mean solar radiation                                   |                                                                                                                                                                                                                 |
| Tmax                                     | Daily maximum temperature                                      | NOAA, National Climatic Data Center: Climate Data Online                                                                                                                                                        |
| AWND                                     | Daily average daily wind speed                                 | ( <a href="http://www.ncdc.noaa.gov/cdo-web/">http://www.ncdc.noaa.gov/cdo-web/</a> ), for Salt Lake City urban site only                                                                                       |
| PBLH                                     | Gridded daily maximum planetary boundary height                | NCEP Climate Forecast System Reanalysis ( <a href="http://rda.ucar.edu/datasets/ds093.0/">http://rda.ucar.edu/datasets/ds093.0/</a> )                                                                           |
| PRCP                                     | Gridded daily precipitation                                    | Climate Prediction Center of the National Weather Service ( <a href="ftp://ftp.cpc.ncep.noaa.gov/precip/CPC_UNI_PRCP/GAUGE_CONUS/V1.0/">ftp://ftp.cpc.ncep.noaa.gov/precip/CPC_UNI_PRCP/GAUGE_CONUS/V1.0/</a> ) |
| U                                        | Gridded daily mean 850, 700, 500 hPa zonal wind                | NCEP/NCAR Reanalysis dataset ( <a href="http://www.esrl.noaa.gov/psd/data/timeseries/daily/">http://www.esrl.noaa.gov/psd/data/timeseries/daily/</a> )                                                          |
| V                                        | Gridded daily mean 850, 700, 500 hPa meridional wind           |                                                                                                                                                                                                                 |
| WSP                                      | Gridded daily mean 850, 700, 500 hPa horizontal wind           |                                                                                                                                                                                                                 |
| Ome                                      | Gridded daily mean 850, 700, 500 hPa vertical velocity         |                                                                                                                                                                                                                 |
| SH                                       | Gridded daily mean 850, 700, 500 hPa specific humidity         |                                                                                                                                                                                                                 |
| HGT                                      | Gridded daily mean 850, 700, 500 hPa geopotential heights      |                                                                                                                                                                                                                 |
| T                                        | Gridded daily mean 850, 700, 500 hPa temperature               |                                                                                                                                                                                                                 |
| dT                                       | Gridded daily mean temperature at 1000mb minus that at 850 hPa |                                                                                                                                                                                                                 |

36 <sup>a</sup> Units are °C (Tsurf, T, dT, Tmax), m s<sup>-1</sup> (WSPsurf, WSP, U, V, AWND), % (RH), W m<sup>-2</sup> (SRAD),  
 37 m (PBLH), geopotential height (HGT), kg • kg<sup>-1</sup> (SH), 0.1 mm (PRCP), and pa s<sup>-1</sup> (Ome).

38 <sup>b</sup> Daytime mean represent average for 10:00-17:00 local time.

39

40

41 **Table S2.** Correlation coefficients (r) between OC aerosol concentration measurements  
 42 and Total Fire Index integrated over different backward days and different footprint  
 43 layers (i.e., model output layer where fire emissions are lifted) at 13 Intermountain  
 44 West CASTNet sites in summers 1989-2010.

| Site | 5-day               |        |        |        | 2-day<br>2000m | 3-day<br>2000m | 4-day<br>2000m | Record<br>number |
|------|---------------------|--------|--------|--------|----------------|----------------|----------------|------------------|
|      | 5000m               | 2000m  | 1500m  | 100m   |                |                |                |                  |
| GLR  | 0.44** <sup>a</sup> | 0.41** | 0.40** | 0.40** | 0.40**         | 0.41**         | 0.41**         | 529              |
| YEL  | 0.44**              | 0.41** | 0.41** | 0.43** | 0.37**         | 0.40**         | 0.41**         | 372              |
| PND  | 0.41**              | 0.39** | 0.38** | 0.38** | 0.36**         | 0.37**         | 0.38**         | 564              |
| CNT  | 0.24*               | 0.19   | 0.20   | 0.20*  | 0.11           | 0.17           | 0.18           | 91               |
| ROM  | 0.32**              | 0.32** | 0.30** | 0.30** | 0.27**         | 0.30**         | 0.31**         | 558              |
| GTH  | 0.39**              | 0.36** | 0.34** | 0.33** | 0.29**         | 0.34**         | 0.35**         | 316              |
| MEV  | 0.36**              | 0.38** | 0.35** | 0.36** | 0.35**         | 0.38**         | 0.37**         | 331              |
| GRB  | 0.33**              | 0.32** | 0.27** | 0.26** | 0.30**         | 0.31**         | 0.32**         | 512              |
| CAN  | 0.38**              | 0.37** | 0.34** | 0.36** | 0.33**         | 0.35**         | 0.37**         | 564              |
| GRC  | 0.25**              | 0.24** | 0.23** | 0.23** | 0.23**         | 0.28**         | 0.23**         | 337              |
| PET  | 0.32**              | 0.32** | 0.31** | 0.32** | 0.32**         | 0.32**         | 0.32**         | 489              |
| CHA  | 0.30**              | 0.29** | 0.27** | 0.27** | 0.30**         | 0.29**         | 0.29**         | 492              |
| BBE  | 0.19**              | 0.28** | 0.15** | 0.12*  | 0.21**         | 0.20**         | 0.26**         | 284              |
| Mean | 0.34**              | 0.33** | 0.30** | 0.31** | 0.29**         | 0.32**         | 0.32**         |                  |

45 <sup>a</sup> Double asterisk (\*\*) denotes the correlations that are strongly significant (p <0.01),  
 46 and single asterisk (\*) denotes the correlations that are significant (p <0.05).

47

**Table S3.** Coefficients of the multi-linear regression (MLR) models for summer MDA8 ozone at 13 Intermountain West CASTNet sites<sup>a</sup>

| Sites<br>(Altitude)   | Total<br>R <sup>2</sup> (N) | Group <sup>b</sup><br>Num. | TFI<br>mean | Ozone<br>mean | R <sup>2</sup> (N) | Variables (coefficient) <sup>c</sup>                                                                                                                             | c      |
|-----------------------|-----------------------------|----------------------------|-------------|---------------|--------------------|------------------------------------------------------------------------------------------------------------------------------------------------------------------|--------|
| <b>GLR</b><br>(976 m) | <b>0.59</b><br>(1809)       | 1                          | 0           | 34.5          | 0.59(228)          | RH(-0.39), HGT850(-0.07), SH850(-861.61), dT(-1.86)                                                                                                              | 178.1  |
|                       |                             | 2                          | 44.96       | 36.6          | 0.57(799)          | RH(-0.30), Ome700(-19.02), HGT850(-0.31), SRAD(0.009), WSPsurf(1.56), U500(-0.159), SH700(-1040.27), V700(0.197), <b>SqrFI(0.377)</b> , HGT700(0.37), T850(-0.9) | -170.7 |
|                       |                             | 3                          | 27144.1     | 41.1          | 0.50(782)          | RH(-0.22), T500(-0.69), SRAD(0.01), <b>SqrFI(0.007)</b> , U850(0.83), Ome700(-18.34), U500(-0.232), SH500(-1253.7), T700(0.72)                                   | 36.08  |
| <b>YEL</b><br>(2400m) | <b>0.35</b><br>(1611)       | 1                          | 0           | 45.5          | 0.40(91)           | WSP500(0.722), RH(-0.19), WSPsurf(-2.034), HGT850(-0.05)                                                                                                         | 124.05 |
|                       |                             | 2                          | 256.8       | 47.3          | 0.34(766)          | RH(-0.29), V700(0.38), Tsurf(-1.21), T700(1.27), SRAD(0.01), HGT500(-0.03), OME500(11.06), WSP850(-0.35), U500(0.26), WSPsurf(-0.69)                             | 221.91 |
|                       |                             | 3                          | 35700.0     | 51.2          | 0.22(754)          | RH(-0.07), V700(0.53), SRAD(0.01), <b>SqrFI(0.005)</b> , <b>SqrFI(0.31)</b> , SH700(-833.17), dT(2.25), <b>FI(-0.006)</b>                                        | 30.46  |
| <b>PND</b><br>(2388m) | <b>0.28</b><br>(1888)       | 1                          | 0           | 53.1          | 0.34(86)           | T700(2.0), SH700(-2399.23), T500(-1.63)                                                                                                                          | 32.84  |
|                       |                             | 2                          | 242.1       | 53.8          | 0.24(895)          | V700(0.35), RH(-0.08), Tsurf(0.09), HGT850(-0.05), SRAD(0.03), WSP700(-0.28), WSPsurf(0.10), SH700(-1433.4), T700(0.17)                                          | 127.33 |
|                       |                             | 3                          | 29574.8     | 56.7          | 0.24(907)          | RH(-0.17), V500(0.27), <b>SqrFI(0.24)</b> , U700(-0.43), <b>SqrFI(0.02)</b> , <b>FI(-1.98E-5)</b> , HGT850(-0.03), Ome700(13.86), T500(-0.27), SH500(569.94)     | 92.21  |
| <b>CNT</b><br>(3178m) | <b>0.19</b><br>(1925)       | 1                          | 0           | 54.0          | 0.35(53)           | SH850(2293.8), SH500(-3435.6), T500(-0.75)                                                                                                                       | 31.4   |
|                       |                             | 2                          | 153.5       | 56.2          | 0.14(913)          | RH(-0.10), SH500(-1514.43), HGT850(-0.023), <b>SqrFI(0.225)</b> , U700(-0.458), WSP850(0.27)                                                                     | 98.8   |
|                       |                             | 3                          | 10517.1     | 58.9          | 0.18(959)          | RH(-0.12), T500(0.68), U700(-0.30), <b>SqrFI(0.3)</b> , <b>FI(-5.02E-5)</b>                                                                                      | 68.89  |
| <b>ROM</b><br>(2743m) | <b>0.36</b><br>(1347)       | 1                          | 0           | 52.5          | 0.25(36)           | RH(-0.20)                                                                                                                                                        | 64.37  |
|                       |                             | 2                          | 107.6       | 54.6          | 0.34(581)          | RH(-0.10), WSPsurf(3.18), U700(-0.88), Tsurf(0.11), SH500(-1967.9), T850(0.43), SRAD(0.005), <b>SqrFI(0.03)</b> , <b>SqrFI(0.04)</b>                             | 47.35  |
|                       |                             | 3                          | 7976.7      | 59.0          | 0.38(730)          | RH(-0.16), U700(-0.96), WSPsurf(2.91), T500(1.21), SRAD(0.01), <b>FI(3.3E-5)</b> , Ome500(-14.89), PRCP(-0.03)                                                   | 37.84  |
| <b>GTH</b><br>(2926m) | <b>0.29</b><br>(1906)       | 1                          | 0           | 50.7          | 0.32(78)           | RH(-0.17), T500(-1.11), Ome850(-39.32)                                                                                                                           | 48.03  |
|                       |                             | 2                          | 108.1       | 51.9          | 0.30(913)          | RH(-0.20), HGT500(-0.04), WSPsurf(1.53), U500(-0.21), <b>SqrFI(0.30)</b> , SH850(216.48), V850(-0.25)                                                            | 273.78 |
|                       |                             | 3                          | 8100.3      | 54.4          | 0.22(915)          | RH(-0.15), <b>SqrFI(0.32)</b> , T500(-0.67), V850(-0.45), FI(-0.01), Ome500(-11.51), WSP500(-0.19), HGT850(-0.03), WSPsurf(0.72), dT(1.67)                       | 72.45  |
| <b>MEV</b><br>(2165m) | <b>0.23</b><br>(1321)       | 1                          | 0           | 52.3          | 0.43(60)           | RH(-0.26)                                                                                                                                                        | 63.73  |
|                       |                             | 2                          | 90.44       | 54.6          | 0.16(555)          | RH(-0.15), U700(-0.51), T700(-1.49), WSPsurf(-0.91), dT(3.15), V700(0.35), Tsurf(0.38),                                                                          | 28.41  |
|                       |                             | 3                          | 13658.64    | 57.6          | 0.19(706)          | Tsurf(0.23), <b>SqrFI(0.20)</b> , <b>SqrFI(0.01)</b> , RH(-0.06), U850(-0.60), SRAD(0.01)                                                                        | 48.49  |
| <b>GRB</b><br>(2060m) | <b>0.40</b><br>(1360)       | 1                          | 0           | 54.3          | 0.38(50)           | WSPsurf(2.39), Ome850(-116.10), SH500(-3840.94)                                                                                                                  | 48.00  |
|                       |                             | 2                          | 77.4        | 55.4          | 0.40(649)          | Ome700(-60.71), Ome850(44.89), WSP500(-0.41), SRAD(0.01), Tsurf(1.01), SH700(-1013.96), <b>SqrFI(0.88)</b> , HGT500(-0.05)                                       | 340.53 |
|                       |                             | 3                          | 16182.4     | 57.5          | 0.38(661)          | Tsurf(1.11), HGT700(-0.09), <b>SqrFI(0.02)</b> , <b>SqrFI(0.16)</b> , WSPsurf(0.98), U850(-0.67), WSP500(-0.18), <b>FI(-1.61E-5)</b>                             | 315.28 |

**Table S3.** Continued

| Sites<br>(Altitude) | Total<br>R <sup>2</sup> (N) | Group <sup>b</sup><br>Num. | TFI<br>mean | Ozone<br>mean | R <sup>2</sup> (N) | Variables (coefficient) <sup>c</sup>                                                                                                                                                                                        | c       |
|---------------------|-----------------------------|----------------------------|-------------|---------------|--------------------|-----------------------------------------------------------------------------------------------------------------------------------------------------------------------------------------------------------------------------|---------|
| CAN<br>(1809m)      | 0.16<br>(1379)              | 1 <sup>d</sup>             | 0           | 55.2          | NAN                | NAN                                                                                                                                                                                                                         | NAN     |
|                     |                             | 2                          | 99.43       | 56.6          | 0.10(638)          | <b>SqrFI<sub>t</sub>(0.14), SqrFI<sub>s</sub>(0.28)</b> , V850(-0.45), Ome500(-19.72), T850(-0.75), Tsurf(0.55)                                                                                                             | 59.21   |
|                     |                             | 3                          | 12448       | 59.4          | 0.13(741)          | <b>SqrFI<sub>t</sub>(0.34)</b> , RH(-0.10), <b>FI<sub>t</sub>(-0.01)</b> , Ome700(-16.03), V500(-0.18), WSPsurf(0.31)                                                                                                       | 58.51   |
| GRC<br>(1874m)      | 0.34<br>(1912)              | 1                          | 0           | 52.2          | 0.33(153)          | SH700(-1564.2), WSP850(-1.23), HGT850(-0.18), HGT500(0.05), PRCP(0.05), SRAD(0.01), SH500(2233.7)                                                                                                                           | 50.60   |
|                     |                             | 2                          | 46.1        | 54.4          | 0.28(873)          | RH(-0.10), HGT850(-0.05), <b>SqrFI<sub>t</sub>(0.46)</b> , Ome850(36.02), V700(-0.41), WSP500(0.41), T850(0.79), SH700(-575.21), SRAD(-0.01)                                                                                | 120.34  |
|                     |                             | 3                          | 17075.1     | 58.1          | 0.31(886)          | V700(-0.39), WSP500(0.34), SH850(-569.03), <b>SqrFI<sub>t</sub>(0.545)</b> , <b>FI<sub>t</sub>(-0.02)</b> , SRAD(0.01), Ome700(-24.27), Ome850(28.77), U700(0.64), WSPsurf(-0.86), T700(1.07), HGT500(-0.05)                | 313.44  |
| PET<br>(1723m)      | 0.43<br>(654)               | 1                          | 0           | 50.7          | 0.28(41)           | RH(-0.19), HGT850(0.12)                                                                                                                                                                                                     | -125.93 |
|                     |                             | 2                          | 73.0        | 56.3          | 0.39(240)          | SRAD(0.02), SH500(2963.8), dT(-3.40), RH(-0.33), V500(-0.50), WSP850(-1.21), T850(0.95), WSP500(0.26)                                                                                                                       | 92.40   |
|                     |                             | 3                          | 38379.5     | 58.2          | 0.39(373)          | V500(-0.50), dT(-2.60), SRAD(0.01), SH500(1412.40), HGT850(-0.06), RH(-0.28), Ome850(33.91), Ome500(-22.14), SH700(898.18), <b>SqrFI<sub>t</sub>(0.19)</b>                                                                  | 173.85  |
| CHA<br>(1570m)      | 0.50<br>(1754)              | 1                          | 0           | 47.2          | 0.32(384)          | RH(-0.21), WSP700(-1.60), WSP500(0.66), V850(-1.15), U850(-0.76)                                                                                                                                                            | 58.16   |
|                     |                             | 2                          | 40.0        | 53.6          | 0.41(677)          | RH(-0.21), WSP700(-0.86), WSP500(0.37), <b>SqrFI<sub>t</sub>(0.64)</b> , dT(-1.23), PBLH(0.001), SH500(980.48), SRAD(0.01), HGT500(-0.024), V850(-0.35)                                                                     | 210.4   |
|                     |                             | 3                          | 14972.1     | 57.1          | 0.38(693)          | WSP700(-0.65), SRAD(0.01), <b>SqrFI<sub>t</sub>(0.81)</b> , V500(-0.25), V850(-0.76), <b>FI<sub>t</sub>(-0.03)</b> , RH(-0.11), T700(-0.52)                                                                                 | 62.80   |
| BBE<br>(1052m)      | 0.46<br>(1196)              | 1                          | 0           | 39.6          | 0.37(450)          | V700(-1.31), RH(-0.12), V850(-0.61), WSPsurf(1.27), U500(0.20)                                                                                                                                                              | 42.87   |
|                     |                             | 2                          | 6.6         | 44.8          | 0.34(373)          | V700(-0.51), WSP850(-0.57), WSP500(0.56), RH(-0.22), T700(-1.07), HGT500(-0.06), SRAD(0.002), <b>FI<sub>t</sub>(-0.06)</b> , <b>SqrFI<sub>t</sub>(-0.79)</b>                                                                | 423.05  |
|                     |                             | 3                          | 3423.7      | 48.0          | 0.35(373)          | V700(-0.46), WSP850(-0.61), WSP500(0.55), RH(-0.22), T700(-1.08), HGT500(-0.06), SRAD(0.002), <b>SqrFI<sub>t</sub>(1.84)</b> , <b>SqrFI<sub>t</sub>(1.07)</b> , <b>FI<sub>t</sub>(-0.10)</b> , <b>FI<sub>s</sub>(-0.37)</b> | 416.83  |

<sup>a</sup> The multi-linear regression (MLR) models are applied to measured MDA8 ozone concentrations in the summers 1989-2010. The regressions follow Equation (3) described in the text.

<sup>b</sup> Groups are separated by the TFI values at each site (group 1: TFI=0, group 2: the lower 50% TFI (with TFI=0 excluded), group 3: the upper 50% TFI).

<sup>c</sup> Variables included in the MLR models in order of significance (e.g., For group 1 at GLR site, RH has the highest significance representing the first variable included in the MLR model). Fire impacts (FI<sub>s</sub>, FI<sub>t</sub>, SqrFI<sub>s</sub>, SqrFI<sub>t</sub>) are denoted in bold.

<sup>d</sup> No MLR model is derived for this case. The records from group 1 and group 2 are then combined.
